# Supplementary material for: A Multivariate Genome-Wide Association Analysis of 10 LDL Subfractions, and Their Response to Statin Treatment, in 1868 Caucasians
Source: PubMed Central journal article supplement (PMC4405269; doi:10.1371/journal.pone.0120758), 2015-04-21
Supplement: pone.0120758.s001.pdf [file pone.0120758.s001.pdf]

## Computing proportion of variance in phenotype explained by a given SNP (PVE)

[1] provides sample size, minor allele frequency (MAF), effect size, and standard error of effect size for each reported SNP (see Supplementary Table 2 in [1]). We estimated PVE using the information from [1] as follows. Variance in phenotype ( $Y$ ) can be decomposed into two components:

$$\text{Var}(Y) = \beta^2 \text{Var}(X) + \sigma^2, \quad (1)$$

where  $\beta$  is effect size of genetic variant ( $X$ ). The first component ( $\beta^2 \text{Var}(X)$ ) captures variance explained by the genetic variant  $X$  and the second component ( $\sigma^2$ ) captures the remaining variance that can be explained by environmental factors or other genetic variants. We can estimate  $\beta^2 \text{Var}(X)$  by  $2\hat{\beta}^2 \text{MAF}(1-\text{MAF})$ , where  $\hat{\beta}$  and MAF are effect size estimate and minor allele frequency for the genetic variant  $X$ , respectively. From a simple linear regression model ( $X$  and  $Y$  as covariate and response),

$$\text{Var}(\hat{\beta}) = (\text{se}(\hat{\beta}))^2 \approx \frac{\sigma^2}{2N\text{MAF}(1-\text{MAF})}, \quad (2)$$

where  $N$  is sample size and  $\text{se}(\hat{\beta})$  is standard error of effect size for the genetic variant  $X$ . Therefore,

$$\text{PVE} = \frac{\beta^2 \text{Var}(X)}{\text{Var}(Y)} = \frac{\beta^2 \text{Var}(X)}{\beta^2 \text{Var}(X) + \sigma^2} \quad (3)$$

can be estimated by

$$\frac{2\hat{\beta}^2 \text{MAF}(1-\text{MAF})}{2\hat{\beta}^2 \text{MAF}(1-\text{MAF}) + (\text{se}(\hat{\beta}))^2 2N\text{MAF}(1-\text{MAF})}. \quad (4)$$

We compute PVE for HDL-C (LDL-C) by using the information for the most strongly associated SNP rs3764261 (rs247616). Note that rs3764261 is in high LD ( $r^2 = 0.96$ ) with rs247616.

## References

1. Teslovich TM, Musunuru K, Smith AV, Edmondson AC, Stylianou IM, Koseki M, et al. Biological, clinical and population relevance of 95 loci for blood lipids. *Nature*. 2010;466:707–713.
