# Supplementary material for: A Multivariate Genome-Wide Association Analysis of 10 LDL Subfractions, and Their Response to Statin Treatment, in 1868 Caucasians
Source: PubMed Central journal article supplement (PMC4405269; doi:10.1371/journal.pone.0120758), 2015-04-21
Supplement: pone.0120758.s007.pdf [file pone.0120758.s007.pdf]

**S1 Table: Summary of the top and secondary associations with LDL subfractions in our analysis.**

| Gene                                    | SORT1     | APOE   | APOE                   | LPA        | LPA         | CETP     | CETP       |
|-----------------------------------------|-----------|--------|------------------------|------------|-------------|----------|------------|
| chr                                     | 1         | 19     | 19                     | 6          | 6           | 16       | 16         |
| type                                    | top       | top    | secondary <sup>1</sup> | top        | secondary   | top      | secondary  |
| SNP                                     | rs7528419 | rs7412 | rs157581               | rs55730499 | 6-161069320 | rs247616 | rs11076175 |
| LDL-C (L)                               |           |        |                        |            |             |          |            |
| log <sub>10</sub> BF <sup>2</sup>       | 3.07      | 7.18   | 3.62                   | -0.28      | -0.44       | -0.12    | -0.05      |
| PP of direct association <sup>3</sup>   | 0.95      | 0      | 0.96                   | 0.07       | 0.06        | 0.15     | 0.27       |
| PP of indirect association <sup>3</sup> | 0.05      | 1      | 0.04                   | 0.03       | 0.12        | 0.41     | 0.63       |
| PP of no association <sup>3</sup>       | 0         | 0      | 0                      | 0.9        | 0.82        | 0.44     | 0.1        |
| LDL peak particle diameter (Ld)         |           |        |                        |            |             |          |            |
| log <sub>10</sub> BF                    | -0.48     | -0.08  | -0.36                  | -0.28      | -0.41       | 13.39    | 3.24       |
| PP of direct association                | 0         | 0.7    | 0.41                   | 0.01       | 0.07        | 0        | 0.98       |
| PP of indirect association              | 0.13      | 0.23   | 0.45                   | 0.03       | 0.17        | 1        | 0.02       |
| PP of no association                    | 0.86      | 0.07   | 0.14                   | 0.96       | 0.76        | 0        | 0          |
| IDL1 (i1)                               |           |        |                        |            |             |          |            |
| log <sub>10</sub> BF                    | -0.20     | 1.47   | 0.2                    | 5.25       | 1.17        | 2.06     | -0.01      |
| PP of direct association                | 0.74      | 0.01   | 0.55                   | 0          | 1           | 0.6      | 0.31       |
| PP of indirect association              | 0.03      | 0.98   | 0.35                   | 1          | 0           | 0.4      | 0.58       |
| PP of no association                    | 0.23      | 0.01   | 0.1                    | 0          | 0           | 0        | 0.1        |
| IDL2 (i2)                               |           |        |                        |            |             |          |            |
| log <sub>10</sub> BF                    | -0.06     | 0.22   | -0.25                  | -0.09      | -0.26       | 0.16     | -0.39      |
| PP of direct association                | 0.76      | 0.22   | 0.61                   | 0          | 0.15        | 0.65     | 0.27       |
| PP of indirect association              | 0.03      | 0.7    | 0.12                   | 0.06       | 0.21        | 0.29     | 0.47       |
| PP of no association                    | 0.21      | 0.09   | 0.28                   | 0.94       | 0.63        | 0.06     | 0.26       |
| IDL3 (i3)                               |           |        |                        |            |             |          |            |
| log <sub>10</sub> BF                    | -0.12     | -0.32  | 0.01                   | -0.24      | -0.46       | -0.38    | -0.24      |
| PP of direct association                | 0.76      | 0.61   | 0.45                   | 0          | 0.11        | 0.31     | 0.19       |
| PP of indirect association              | 0.03      | 0.24   | 0.43                   | 0.03       | 0.01        | 0.23     | 0.69       |
| PP of no association                    | 0.21      | 0.15   | 0.12                   | 0.97       | 0.88        | 0.46     | 0.12       |
| LDL1 (l1)                               |           |        |                        |            |             |          |            |
| log <sub>10</sub> BF                    | -0.31     | 1.69   | 0.97                   | -0.29      | -0.46       | 5.75     | 1.42       |
| PP of direct association                | 0.75      | 0.71   | 0.45                   | 0.07       | 0.07        | 0.86     | 0.21       |
| PP of indirect association              | 0.03      | 0.29   | 0.54                   | 0.03       | 0.08        | 0.14     | 0.78       |
| PP of no association                    | 0.22      | 0      | 0.01                   | 0.9        | 0.85        | 0        | 0.01       |
| LDL2a (l2a)                             |           |        |                        |            |             |          |            |
| log <sub>10</sub> BF                    | -0.41     | 5.02   | 1.08                   | -0.29      | -0.43       | 2.60     | 1.06       |
| PP of direct association                | 0.71      | 0.74   | 0.39                   | 0.06       | 0.06        | 0.86     | 0.21       |
| PP of indirect association              | 0.03      | 0.26   | 0.59                   | 0.03       | 0.16        | 0.14     | 0.77       |
| PP of no association                    | 0.26      | 0      | 0.02                   | 0.91       | 0.78        | 0        | 0.02       |
| LDL2b (l2b)                             |           |        |                        |            |             |          |            |
| log <sub>10</sub> BF                    | -0.12     | 2.51   | -0.08                  | -0.26      | -0.45       | -0.31    | -0.43      |
| PP of direct association                | 0.68      | 0.39   | 0.53                   | 0.06       | 0.05        | 0.79     | 0.25       |
| PP of indirect association              | 0.05      | 0.61   | 0.28                   | 0.03       | 0.15        | 0.12     | 0.39       |
| PP of no association                    | 0.27      | 0      | 0.2                    | 0.91       | 0.8         | 0.09     | 0.36       |
| LDL3a (l3a)                             |           |        |                        |            |             |          |            |
| log <sub>10</sub> BF                    | 1.32      | 0.63   | -0.15                  | -0.29      | -0.46       | 2.68     | 0.08       |
| PP of direct association                | 0.97      | 0.68   | 0.36                   | 0.08       | 0.05        | 0.81     | 0.22       |
| PP of indirect association              | 0.03      | 0.31   | 0.54                   | 0.03       | 0.15        | 0.19     | 0.73       |
| PP of no association                    | 0         | 0.01   | 0.1                    | 0.89       | 0.8         | 0        | 0.05       |
| LDL3b (l3b)                             |           |        |                        |            |             |          |            |
| log <sub>10</sub> BF                    | 11.84     | 0.41   | 0.30                   | -0.29      | -0.45       | 0.45     | -0.40      |
| PP of direct association                | 0.94      | 0.54   | 0.41                   | 0.06       | 0.05        | 0.87     | 0.19       |
| PP of indirect association              | 0.06      | 0.44   | 0.54                   | 0.03       | 0.16        | 0.13     | 0.62       |
| PP of no association                    | 0         | 0.02   | 0.05                   | 0.91       | 0.79        | 0.01     | 0.19       |
| LDL4a (l4a)                             |           |        |                        |            |             |          |            |
| log <sub>10</sub> BF                    | 28.92     | -0.13  | 1.52                   | -0.29      | -0.38       | -0.52    | -0.44      |
| PP of direct association                | 0         | 0.54   | 0.63                   | 0.09       | 0.06        | 0.62     | 0.21       |
| PP of indirect association              | 1         | 0.37   | 0.35                   | 0.03       | 0.15        | 0.13     | 0.54       |
| PP of no association                    | 0         | 0.09   | 0.02                   | 0.88       | 0.79        | 0.25     | 0.25       |
| LDL4b (l4b)                             |           |        |                        |            |             |          |            |
| log <sub>10</sub> BF                    | 12.99     | -0.14  | 0.86                   | -0.28      | -0.31       | -0.53    | -0.44      |
| PP of direct association                | 0.97      | 0      | 0.4                    | 0.09       | 0.06        | 0.16     | 0.26       |
| PP of indirect association              | 0.03      | 0.71   | 0.57                   | 0.03       | 0.16        | 0.26     | 0.4        |
| PP of no association                    | 0         | 0.28   | 0.03                   | 0.88       | 0.78        | 0.59     | 0.35       |

Abbreviations for each phenotype are in parentheses.

<sup>1</sup> Results for secondary SNPs are from analysis on the residuals obtained by regressing out the effects of the most strongly associated SNP (top SNP) in each gene.

<sup>2</sup> log<sub>10</sub>Bayes Factor from a univariate analysis of each phenotype.

<sup>3</sup> Marginal posterior probability of direct, indirect, no association for each phenotype that is computed from our multivariate analysis. Here, we compute these posterior probabilities conditional on at least one phenotype being directly associated.
